# Supplementary material for: Impact of diffusion methods and metal cations on photochromic three-component D–A hybrid heterostructures
Source: Royal Society of Chemistry journal article supplement (doi:10.1039/d0dt02532a), 2020-01-01
Supplement: d0dt02532a1.pdf [file d0dt02532a1.pdf]

Supporting Information for

## Impact of diffusion methods and metal cations on photochromic three-component D-A hybrid heterostructures

Ming-Hua You <sup>a,b</sup>, Meng-Hua Li <sup>b,d</sup>, Jing-Yan Liu <sup>b,d</sup> and Mei-Jin Lin <sup>b,c,d\*</sup>

<sup>a</sup> College of Zhicheng, Fuzhou University, China, 350002

<sup>b</sup> Key Laboratory of Molecule Synthesis and Function Discovery, and State Key Laboratory of Photocatalysis on Energy and Environment, College of Chemistry, Fuzhou University, China, 350116. E-mail: meijin\_lin@fzu.edu.cn.

<sup>c</sup> College of Materials Science and Engineering, Fuzhou University, China, 350116

<sup>d</sup> Fujian Provincial Key Laboratory of Electrochemical Energy Storage Materials, Fuzhou University, Fuzhou, Fujian, 350002, China

### Table of Contents:

|                                                     |    |
|-----------------------------------------------------|----|
| 1. Crystal data and structure refinement parameters | S2 |
| 2. Infrared spectral analysis                       | S3 |
| 3. X-ray powder diffraction analysis                | S4 |

# 1. Crystal data and structure refinement parameters

**Table S1.** Crystal data and structure refinement parameters for the crystals of **1-A**, **2-A**, **1-B** and **2-B**

| Complexes                                             | 1-A                                                                                               | 1-B                                                                                               | 2-A                                                                                                | 2-B                                                                                                |
|-------------------------------------------------------|---------------------------------------------------------------------------------------------------|---------------------------------------------------------------------------------------------------|----------------------------------------------------------------------------------------------------|----------------------------------------------------------------------------------------------------|
| Empirical formula                                     | C <sub>48</sub> H <sub>24</sub> Mo <sub>12</sub> N <sub>8</sub> O <sub>52</sub> SiZn <sub>4</sub> | C <sub>48</sub> H <sub>24</sub> Mo <sub>12</sub> N <sub>8</sub> O <sub>52</sub> SiZn <sub>4</sub> | C <sub>48</sub> H <sub>32</sub> Cd <sub>2</sub> Mo <sub>12</sub> N <sub>8</sub> O <sub>52</sub> Si | C <sub>48</sub> H <sub>32</sub> Cd <sub>2</sub> Mo <sub>12</sub> N <sub>8</sub> O <sub>52</sub> Si |
| Formula weight                                        | 2985.60                                                                                           | 2985.60                                                                                           | 2956.98                                                                                            | 2956.98                                                                                            |
| Temperature/K                                         | 293(2)                                                                                            | 293(2)                                                                                            | 293(2)                                                                                             | 293(2)                                                                                             |
| Crystal system                                        | monoclinic                                                                                        | tetragonal                                                                                        | tetragonal                                                                                         | tetragonal                                                                                         |
| Space group                                           | <i>I</i> 2/ <i>a</i>                                                                              | <i>P</i> -4 <i>m</i> 2                                                                            | <i>I</i> 4 <sub>1</sub> / <i>amd</i>                                                               | <i>P</i> 4 <sub>1</sub> 2 <sub>1</sub> 2                                                           |
| <i>a</i> /Å                                           | 24.4203(5)                                                                                        | 19.5638(6)                                                                                        | 19.8634(12)                                                                                        | 19.8472(11)                                                                                        |
| <i>b</i> /Å                                           | 27.6230(4)                                                                                        | 19.5638(6)                                                                                        | 19.8634(12)                                                                                        | 19.8472(11)                                                                                        |
| <i>c</i> /Å                                           | 24.4269(6)                                                                                        | 39.891(3)                                                                                         | 39.282(9)                                                                                          | 39.686(3)                                                                                          |
| $\alpha$ /°                                           | 90                                                                                                | 90                                                                                                | 90                                                                                                 | 90                                                                                                 |
| $\beta$ /°                                            | 111.175(2)                                                                                        | 90                                                                                                | 90                                                                                                 | 90                                                                                                 |
| $\gamma$ /°                                           | 90                                                                                                | 90                                                                                                | 90                                                                                                 | 90                                                                                                 |
| Volume/Å <sup>3</sup>                                 | 15364.9(6)                                                                                        | 15268.1(13)                                                                                       | 15499(4)                                                                                           | 15633(2)                                                                                           |
| Z                                                     | 4                                                                                                 | 4                                                                                                 | 4                                                                                                  | 4                                                                                                  |
| $\rho_{\text{calc}}$ /cm <sup>3</sup>                 | 1.291                                                                                             | 1.668                                                                                             | 1.267                                                                                              | 2.908                                                                                              |
| $\mu$ /mm <sup>-1</sup>                               | 5.918                                                                                             | 3.992                                                                                             | 1.267                                                                                              | 3.718                                                                                              |
| F(000)                                                | 5688.0                                                                                            | 7128.0                                                                                            | 5624.0                                                                                             | 13065.0                                                                                            |
| Reflections collected                                 | 12931                                                                                             | 77361                                                                                             | 4594                                                                                               | 72116                                                                                              |
| Independent reflections                               | 12931                                                                                             | 18089                                                                                             | 4594                                                                                               | 18299                                                                                              |
| Data/restraints/parameters                            | 12931/0/554                                                                                       | 18089/0/314                                                                                       | 4594/1/153                                                                                         | 18299/0/355                                                                                        |
| Goodness-of-fit on F <sup>2</sup>                     | 0.963                                                                                             | 2.411                                                                                             | 0.946                                                                                              | 1.295                                                                                              |
| $R_1^a, wR_2^b$ ( <i>I</i> > 2 $\sigma$ ( <i>I</i> )) | $R_1 = 0.0701,$<br>$wR_2 = 0.2367$                                                                | $R_1 = 0.2648,$<br>$wR_2 = 0.5325$                                                                | $R_1 = 0.0960,$<br>$wR_2 = 0.2384$                                                                 | $R_1 = 0.2524,$<br>$wR_2 = 0.5301$                                                                 |
| $R_1^a, wR_2^b$ (all data)                            | $R_1 = 0.0885,$<br>$wR_2 = 0.2514$                                                                | $R_1 = 0.4733,$<br>$wR_2 = 0.6012$                                                                | $R_1 = 0.1451,$<br>$wR_2 = 0.2671$                                                                 | $R_1 = 0.4835,$<br>$wR_2 = 0.6224$                                                                 |

$$^a R_1 = \sum ||F_0| - |F_c|| / \sum |F_0|. \quad ^b wR_2 = \{ \sum [w(F_0^2 - F_c^2)^2] / \sum [w(F_0^2)^2] \}^{1/2}.$$

## 2. Infrared spectral analysis

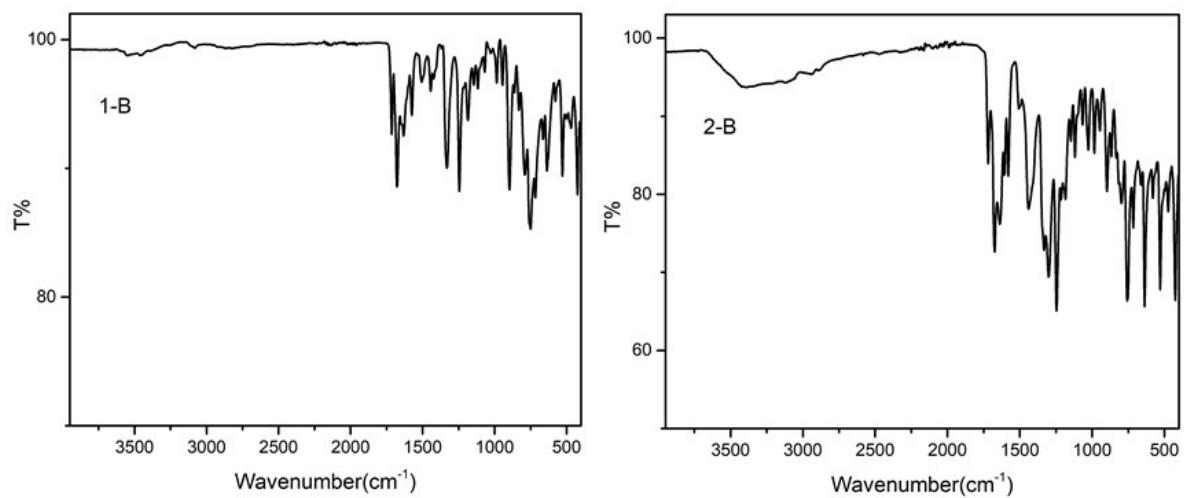

**Fig. S1.** Infrared spectra of hybrid complexes **1-B** and **2-B**

### 3. X-ray powder diffraction analysis

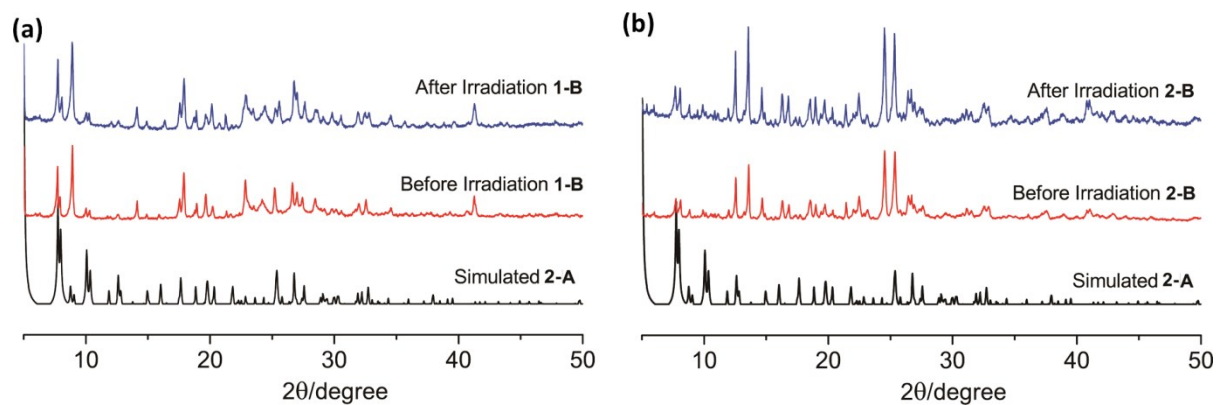

**Fig. S2.** The observed PXRD patterns for hybrid complexes **1-B**, **2-B** before and after irradiations, as well as that of the simulated **2-A**.
